# Supplementary material
Source: PubMed Central journal article supplement (PMC6276375)
Supplement: NIHMS973214-supplement-Sup_Tables_1_and_2.pdf [file NIHMS973214-supplement-Sup_Tables_1_and_2.pdf]

## Supplemental Table 1

### Genotypes

| <i>D. melanogaster</i> males:                                     | <i>D. melanogaster</i> male genotype                                              | Figure                                                                              |
|-------------------------------------------------------------------|-----------------------------------------------------------------------------------|-------------------------------------------------------------------------------------|
| WT                                                                | + ; +/+ ; +/+                                                                     | Fig. 1, Extended Data Fig. 1                                                        |
| <i>fru</i> <sup>Gal4</sup> >UAS-GFP                               | w- ; UAS-GFP/+ ; <i>fru</i> <sup>Gal4</sup> /+                                    | Fig. 2a, Extended Data Fig. 2b-g                                                    |
| WT <i>fru</i> <sup>Gal4</sup> >UAS-GCaMP                          | w- ; UAS-GCaMP/cyo ; <i>fru</i> <sup>Gal4</sup> /tm6b                             | Fig. 3a-b, 4e, 4g (function), 5c, 5e-f, Extended Data Fig. 3e, 4i, 6d, 6h, 7c       |
| <i>ppk23</i> <sup>-/-</sup> <i>fru</i> <sup>Gal4</sup> >UAS-GCaMP | w+, $\Delta$ <i>ppk23</i> ; UAS-GCaMP/+ ; <i>fru</i> <sup>Gal4</sup> /+           | Fig. 3b, Extended Data Fig. 3e, 4i, 6c-d                                            |
| <i>ppk23</i> -Gal4>UAS-GCaMP                                      | w- ; UAS-GCaMP/cyo ; <i>ppk23</i> -Gal4/tm6b                                      | Fig. 3d, Extended Data Fig. 3e, 3f                                                  |
| <i>ppk23</i> -Gal4                                                | w- ; +/+ ; <i>ppk23</i> -Gal4/+                                                   | Fig. 3e                                                                             |
| UAS-CsChrimson                                                    | w-, 20xUAS-IVS-CsChrimson. <i>mVenus</i> ; +/+ ; +/+                              | Fig. 3e                                                                             |
| <i>ppk23</i> -Gal4>UAS-CsChrimson                                 | w-, 20xUAS-IVS-CsChrimson. <i>mVenus</i> ; +/+ ; <i>ppk23</i> -Gal4/+             | Fig. 3e                                                                             |
| <i>fru</i> <sup>LexA</sup> > LexA-Op-GFP, SplitP1-Gal4>UAS-GCaMP  | w- ; UAS-GCaMP6s, LexAOp-Tomato/SplitP1-Gal4 AD ; Fru-LexA/ SplitP1-Gal4 DBD      | Fig. 4a, 4g (anatomy)                                                               |
| <i>fru</i> <sup>LexA</sup> > LexAOp-sPA-t2a-sPA-GFP               | w- ; LexAOp-SPA-T2A-SPA / LexAOp-SPA-T2A-SPA ; FruLexA/tm2                        | Fig. 5b, Extended Data Fig. 5a-c                                                    |
| <i>mAL</i> -Gal4>UAS-GCaMP                                        | w- ; UAS-GCaMP/+ ; R25E04-Gal4/+                                                  | Fig. 5d, Extended Data Fig. 6e, 6g                                                  |
| <i>ppk23</i> -Gal4>UAS-GFP                                        | w- ; UAS-GFP/cyo ; <i>ppk23</i> -Gal4/tm6b                                        | Extended Data Fig. 3a-c                                                             |
| <i>P1</i> -Gal4>UAS-GCaMP                                         | w-, UAS-CsChrimson ; +/+ ; R71G01-Gal4/+                                          | Extended Data Fig. 4a-b                                                             |
| <i>fru</i> <sup>LexA</sup> > LexA-Op-GCaMP, P1-Gal4>UAS-Tomato    | w- ; UAS-tdTomato/LexAOp-GCaMP6s ; R71G01-Gal4/ <i>fru</i> -LexA                  | Extended Data Fig. 4g                                                               |
| WT <i>P1</i> -Gal4 > UAS-GCaMP                                    | w- ; UAS-GCaMP/cyo ; 71G01-Gal4/tm6b                                              | Extended Data Fig. 4h                                                               |
| <i>ppk23</i> <sup>-/-</sup> <i>P1</i> -Gal4 > UAS-GCaMP           | w+, $\Delta$ <i>ppk23</i> ; UAS-GCaMP/+ ; 71G01-Gal4/+                            | Extended Data Fig. 4h                                                               |
| <i>fru</i> <sup>LexA</sup> > LexA-Op-GCaMP, vAB3-Gal4>UAS-Tomato  | w- ; UAS-tdTomato/LexAOp-GCaMP6s ; AbdominalB[LDN]-Gal4/ <i>fru</i> -LexA         | Extended Data Fig. 6a                                                               |
| WT vAB3-Gal4 > UAS-GCaMP                                          | w- ; UAS-GCaMP6s/cyo ; <i>AbdB</i> -Gal4/tm2                                      | Extended Data Fig. 6a-b                                                             |
| <i>ppk23</i> <sup>-/-</sup> vAB3-Gal4 > UAS-GCaMP                 | w+, $\Delta$ <i>ppk23</i> ; UAS-GCaMP6s/+ ; <i>AbdB</i> -Gal4/+                   | Extended Data Fig. 6b                                                               |
| <hr/>                                                             |                                                                                   |                                                                                     |
| <i>D. simulans</i> males:                                         | <i>D. simulans</i> male genotype                                                  | Figure                                                                              |
| WT                                                                | w+ ; +/+ ; +/+                                                                    | Fig. 1, 2b, Extended Data Fig. 1                                                    |
| <i>Gr32a</i> <sup>-/-</sup>                                       | w+ ; $\Delta$ <i>Gr32a</i> / $\Delta$ <i>Gr32a</i> ; +/+                          | Fig. 1, Extended Data Fig. 1                                                        |
| <i>ppk23</i> <sup>-/-</sup>                                       | w+, $\Delta$ <i>ppk23</i> ; +/+ ; +/+                                             | Fig. 1, Extended Data Fig. 1                                                        |
| <i>fru</i> <sup>GFP</sup>                                         | w+ ; +/+ ; <i>fru</i> <sup>GFP</sup> /+                                           | Fig. 2a, 4a, 4g (anatomy), 5b, Extended Data Fig. 2a-g, 5a-d                        |
| <i>fru</i> <sup>-/-</sup>                                         | w- ; +/+ ; $\Delta$ <i>fru</i> / $\Delta$ <i>fru</i>                              | Fig. 2b, Extended Data Fig. 2h                                                      |
| <i>fru</i> <sup>Gal4</sup>                                        | w+ ; +/+ ; <i>fru</i> <sup>Gal4</sup> /+                                          | Fig. 2c, Extended Data Fig. 2a                                                      |
| <i>fru</i> <sup>Gal4</sup> > UAS-CsChrimson                       | w+ ; +/+ ; 20xUAS-IVS-CsChrimson.tdTomato (2039)/ <i>fru</i> <sup>Gal4</sup>      | Fig. 2c                                                                             |
| WT <i>fru</i> <sup>Gal4</sup> > UAS-GCaMP                         | w- ; +/+ ; <i>fru</i> <sup>Gal4</sup> / UAS-GCaMP6s (2186)                        | Fig. 3a, 3c, 4f, 4h (function), 5c, 5e-f, Extended Data Fig. 3e, 4j, 6c-d, 6h, 7a-g |
| <i>ppk23</i> <sup>-/-</sup> <i>fru</i> <sup>Gal4</sup> >UAS-GCaMP | w+, $\Delta$ <i>ppk23</i> ; +/+ ; <i>fru</i> <sup>Gal4</sup> / UAS-GCaMP6s (2186) | Fig. 3c, Extended Data Fig. 3e, 4j                                                  |

|                                     |                                                                           |                                                 |
|-------------------------------------|---------------------------------------------------------------------------|-------------------------------------------------|
| <i>ppk23-Gal4&gt;UAS-GCaMP</i>      | w- ; <i>ppk23-Gal4</i> (2176)/+ ; UAS-GCaMP (2186)/+                      | Fig. 3d, <i>Extended Data Fig. 3a-f</i>         |
| <i>ppk23-Gal4</i>                   | w+ ; <i>ppk23-Gal4</i> (2176)/+ ; +/+                                     | Fig. 3e                                         |
| <i>UAS-CsChrimson</i>               | w+ ; +/+ ; 20xUAS-IVS-CsChrimson.tdTomato (2039)                          | Fig. 3e                                         |
| <i>ppk23-Gal4&gt;UAS-CsChrimson</i> | w+ ; <i>ppk23-Gal4</i> (2176)/+ ; 20xUAS-IVS-CsChrimson.tdTomato (2039)/+ | Fig. 3e                                         |
| <i>P1-Gal4&gt; UAS-CsChrimson</i>   | w+ ; <i>R71G01-Gal4/+</i> ; 20xUAS-IVS-CsChrimson.mVenus/+                | <i>Fig. 4b, 4c, Extended Data Fig. 4a, 4c-f</i> |
| <i>UAS-CsChrimson</i>               | w+ ; +/+ ; <i>UAS-CsChrimson.mVenus/+</i>                                 | <i>Extended Data Fig. 4d-f, 6f</i>              |
| <i>mAL-Gal4&gt;UAS-GCaMP</i>        | w- ; <i>R25E04-Gal4</i> (2176)/+ ; UAS-GCaMP6s (2186)/+                   | <i>Fig. 5d, Extended Data Fig. 6e, 6g</i>       |
| <i>mAL-Gal4&gt;UAS-CsChrimson</i>   | w+ ; <i>R25E04-Gal4</i> (2176)/+ ; UAS-CsChrimson.mVenus/+                | <i>Extended Data Fig. 6f</i>                    |
| <i>mAL-Gal4</i>                     | w+ ; <i>R25E04-Gal4</i> (2176)/+ ; +/+                                    | <i>Extended Data Fig. 6f</i>                    |

Landing Sites: attP 2178 (3R), attP 2176 (2L), attP 2186 (3R) and attP 2039 (3L)

*D. melanogaster*, *D. simulans*, *D. sechellia*, *D. erecta* and *D. ananassae* females: always wild type (+/+ ; +/+ ; +/+)

## Sample Size and Statistics

### Figures 1b, d and e

Analysis (1b, d): Courtship Preference = (time spent courting *D. simulans* (sim) female - time spent courting *D. melanogaster* (mel) female)/(total time spent courting)

Analysis (1e): Courtship Preference = (time spent courting *D. simulans* female perfumed with ethanol (+EtOH) - time spent courting *D. simulans* female perfumed with 7,11-HD (7,11-HD))/(total time spent courting)

Null hypothesis: The male spends equal time courting both females thus exhibiting a preference index of zero

All are biological replicates assessed with a two-tailed test

| Figure | Species | Condition                   | Targets        | Sample Size<br>(# males tested) | Statistical Test  | P-value           |         |
|--------|---------|-----------------------------|----------------|---------------------------------|-------------------|-------------------|---------|
| 1b     | mel     | WT                          | + tarsi        | mel v sim                       | 13                | One-sample t-test | <0.0001 |
|        | mel     | WT                          | - tarsi        | mel v sim                       | 17                | One-sample t-test | 0.9303  |
|        | sim     | WT                          | + tarsi        | mel v sim                       | 17                | One-sample t-test | 0.0009  |
|        | sim     | WT                          | - tarsi        | mel v sim                       | 17                | One-sample t-test | 0.4521  |
| 1d     | sim     | wild type                   | mel v sim      | 19                              | One-sample t-test | <0.0001           |         |
|        | sim     | <i>Gr32a</i> <sup>-/-</sup> | mel v sim      | 20                              | One-sample t-test | <0.0001           |         |
|        | sim     | <i>ppk23</i> <sup>-/-</sup> | mel v sim      | 20                              | One-sample t-test | 0.9931            |         |
| 1e     | sim     | wild type                   | EtOH v 7,11-HD | 19                              | One-sample t-test | <0.0001           |         |
|        | sim     | <i>ppk23</i> <sup>-/-</sup> | EtOH v 7,11-HD | 19                              | One-sample t-test | 0.534             |         |

### Figures 1c

Analysis: Courtship Index = total time male courts a female / total time of the assay

Null hypothesis: The courtship index is equivalent for all groups

All are biological replicates assessed with a two-tailed test

Different letters represent significant differences in courtship behavior

| Figure | Genotype                        | Target female | # | Sample Size (# males tested) | Statistical Test                | Multiple comparisons test | Adjusted P-value | Summary | Group |
|--------|---------------------------------|---------------|---|------------------------------|---------------------------------|---------------------------|------------------|---------|-------|
| 1d     | sim wild type                   | sim           | 1 | 25                           | Kruskal-Wallis test<br>P<0.0001 | 1v2                       | >0.9999          | ns      | 1 = A |
|        | sim <i>Gr32a</i> <sup>-/-</sup> | sim           | 2 | 24                           |                                 | 1v3                       | >0.9999          | ns      | 2 = A |
|        | sim <i>ppk23</i> <sup>-/-</sup> | sim           | 3 | 24                           |                                 | 1v4                       | <0.0001          | ****    | 3 = A |
|        | sim wild type                   | mel           | 4 | 24                           |                                 | 1v5                       | <0.0001          | ****    | 4 = B |
|        | sim <i>Gr32a</i> <sup>-/-</sup> | mel           | 5 | 24                           |                                 | 1v6                       | >0.9999          | ns      | 5 = B |
|        | sim <i>ppk23</i> <sup>-/-</sup> | mel           | 6 | 24                           |                                 | 2v3                       | >0.9999          | ns      | 6 = A |
|        |                                 |               |   |                              |                                 | 2v4                       | <0.0001          | ****    |       |
|        |                                 |               |   |                              |                                 | 2v5                       | <0.0001          | ****    |       |
|        |                                 |               |   |                              |                                 | 2v6                       | 0.5992           | ns      |       |
|        |                                 |               |   |                              |                                 | 3v4                       | 0.0002           | ***     |       |
|        |                                 |               |   |                              |                                 | 3v5                       | <0.0001          | ****    |       |
|        |                                 |               |   | 3v6                          | >0.9999                         | ns                        |                  |         |       |
|        |                                 |               |   | 4v5                          | >0.9999                         | ns                        |                  |         |       |
|        |                                 |               |   | 4v6                          | 0.0012                          | **                        |                  |         |       |
|        |                                 |               |   | 5v6                          | 0.0004                          | ***                       |                  |         |       |

### Figure 2b

Analysis: Courtship Preference = (time spent courting *D. simulans* (sim) female-time spent courting *D. melanogaster* (mel) female)/(total time spent courting)

Null hypothesis: The male spends equal time courting both females thus exhibiting a preference index of zero

All are biological replicates assessed with a two-tailed test

| Figure  | Species | Condition                 | Target Female | Sample Size (# males tested) | Statistical Test  | One-tailed or Two-tailed | P-value |
|---------|---------|---------------------------|---------------|------------------------------|-------------------|--------------------------|---------|
| Fig. 2b | sim     | wild type                 | sim v mel     | 16                           | One-sample t-test | Two-tailed               | <0.0001 |
|         | sim     | <i>fru</i> <sup>-/-</sup> | sim v mel     | 18                           | One-sample t-test | Two-tailed               | 0.5644  |

### Figure 2c

Analysis: Courtship Behavior Index = fraction of time male is displaying courtship behavior

Null hypothesis Wilcoxon: Fraction of time spent displaying courtship behaviors in light and dark is equal

All are biological replicates assessed with a two-tailed test

| Figure  | Genotype                                           | Target | Sample Size (# males tested) | Statistical Test                        | Comparison                 | P-value |
|---------|----------------------------------------------------|--------|------------------------------|-----------------------------------------|----------------------------|---------|
| Fig. 2c | <i>fru</i> <sup>Gal4</sup>                         | n/a    | 5                            | Wilcoxon matched-pairs signed rank test | with light v without light | 0.999   |
|         | <i>fru</i> <sup>Gal4</sup> >UAS- <i>CsChrimson</i> | n/a    | 5                            | Wilcoxon matched-pairs signed rank test | with light v without light | 0.034   |

### Figures 3b-d, 4e, 4f

Analysis: Average peak  $\Delta F/F$  response to a female stimulus measured in the VNC (3b-d) or LPC (4e, f) per male

Null hypothesis: Responses to *D. simulans* (sim) female and *D. melanogaster* (mel) female are equal

All are biological replicates assessed with a two-tailed test

| Figure | Species | Genotype | Stimulus | Sample Size (# males imaged) | Statistical comparison | Statistical Test | P-value |
|--------|---------|----------|----------|------------------------------|------------------------|------------------|---------|
|--------|---------|----------|----------|------------------------------|------------------------|------------------|---------|

|    |     |                                                                                 |                        |    |                      |                                                  |         |
|----|-----|---------------------------------------------------------------------------------|------------------------|----|----------------------|--------------------------------------------------|---------|
| 3b | mel | <i>WT</i><br><i>fru<sup>Gal4</sup>&gt;</i><br><i>UAS-GCaMP</i>                  | mel and<br>sim females | 14 | mel v sim<br>females | Wilcoxon<br>matched-pairs<br>signed rank<br>test | 0.0002  |
|    | mel | <i>ppk23<sup>-/-</sup></i><br><i>fru<sup>Gal4</sup>&gt;</i><br><i>UAS-GCaMP</i> | mel and<br>sim females | 6  | mel v sim<br>females | Wilcoxon<br>matched-pairs<br>signed rank<br>test | >0.9999 |
| 3c | sim | <i>WT</i><br><i>fru<sup>Gal4</sup>&gt;</i><br><i>UAS-GCaMP</i>                  | mel and<br>sim females | 12 | mel v sim<br>females | Wilcoxon<br>matched-pairs<br>signed rank<br>test | 0.005   |
|    | sim | <i>ppk23<sup>-/-</sup></i><br><i>fru<sup>Gal4</sup>&gt;</i><br><i>UAS-GCaMP</i> | mel and<br>sim females | 6  | mel v sim<br>females | Wilcoxon<br>matched-pairs<br>signed rank<br>test | 0.6875  |
| 3d | mel | <i>ppk23-Gal4&gt;</i><br><i>UAS-GCaMP</i>                                       | mel and<br>sim females | 6  | mel v sim<br>females | Wilcoxon<br>matched-pairs<br>signed rank<br>test | 0.0078  |
|    | sim | <i>ppk23-Gal4&gt;</i><br><i>UAS-GCaMP</i>                                       | mel and<br>sim females | 6  | mel v sim<br>females | Wilcoxon<br>matched-pairs<br>signed rank<br>test | 0.0313  |
| 4e | mel | <i>fru<sup>Gal4</sup>&gt;</i><br><i>UAS-GCaMP</i>                               | mel and<br>sim females | 9  | mel v sim<br>females | Paired t-test                                    | <0.0001 |
| 4f | sim | <i>fru<sup>Gal4</sup>&gt;</i><br><i>UAS-GCaMP</i>                               | mel and<br>sim females | 12 | mel v sim<br>females | Paired t-test                                    | <0.0001 |

### Figures 3e

Analysis: Courtship Index = total time male courts a female / total time of the assay

Null hypothesis: The courtship index is equivalent for all groups

All are biological replicates assessed with a two-tailed test

Different letters represent significant differences in courtship behavior

| Figure | Species | Genotype                                       | Target female | # | Sample Size (# males tested) | Statistical Test                | Multiple comparisons test | Adjusted P-value | Summary | Group |
|--------|---------|------------------------------------------------|---------------|---|------------------------------|---------------------------------|---------------------------|------------------|---------|-------|
| 3e     | mel     | <i>ppk23-Gal4</i>                              | mel           | 1 | 16                           | Kruskal-Wallis test<br>P<0.0001 | 1v2                       | 0.4957           | ns      | 1 = A |
|        | mel     | <i>UAS-CsChrimson</i>                          | mel           | 2 | 17                           |                                 | 1v3                       | <0.0001          | ****    | 2 = A |
|        | mel     | <i>ppk23-Gal4&gt;</i><br><i>UAS-CsChrimson</i> | mel           | 3 | 17                           |                                 | 2v3                       | 0.0037           | **      | 3 = B |
|        | sim     | <i>ppk23-Gal4</i>                              | sim           | 1 | 24                           | Kruskal-Wallis test<br>P<0.0001 | 1v2                       | >0.9999          | ns      | 1 = A |
|        | sim     | <i>UAS-CsChrimson</i>                          | sim           | 2 | 21                           |                                 | 1v3                       | <0.0001          | ****    | 2 = A |
|        | sim     | <i>ppk23-Gal4&gt;</i><br><i>UAS-CsChrimson</i> | sim           | 3 | 23                           |                                 | 2v3                       | <0.0001          | ****    | 3 = B |

### Figures 4b

Analysis: Courtship Index = total time male courts a female / total time of the assay

Null hypothesis: The courtship index is equivalent for all groups

All are biological replicates assessed with a two-tailed test

Different letters represent significant differences in courtship behavior

| Figure | Species | Genotype                            | Target                         | # | Sample Size<br>(# males tested) | Statistical Test                | Multiple comparisons test | Adjusted P-value | Summary | Group |
|--------|---------|-------------------------------------|--------------------------------|---|---------------------------------|---------------------------------|---------------------------|------------------|---------|-------|
| 4b     | sim     | <i>71G01-Gal4&gt;UAS-CsChrimson</i> | magnet: pre-stimulation        | 1 | 18                              | Kruskal-Wallis test<br>P<0.0001 | 1v2                       | <0.0001          | ****    | 1 = A |
|        | sim     | <i>71G01-Gal4&gt;UAS-CsChrimson</i> | magnet: during stimulation     | 2 | 18                              |                                 | 1v3                       | 0.0039           | **      | 2 = B |
|        | sim     | <i>71G01-Gal4&gt;UAS-CsChrimson</i> | magnet: post-stimulation       | 3 | 18                              |                                 | 2v3                       | 0.0014           | **      | 3 = C |
|        | sim     | <i>71G01-Gal4&gt;UAS-CsChrimson</i> | sim female: pre-stimulation    | 1 | 18                              | Kruskal-Wallis test<br>P<0.0001 | 1v2                       | <0.0001          | ****    | 1 = A |
|        | sim     | <i>71G01-Gal4&gt;UAS-CsChrimson</i> | sim female: during stimulation | 2 | 18                              |                                 | 1v3                       | 0.0001           | ***     | 2 = B |
|        | sim     | <i>71G01-Gal4&gt;UAS-CsChrimson</i> | sim female: post-stimulation   | 3 | 18                              |                                 | 2v3                       | 0.0101           | *       | 3 = C |
|        | sim     | <i>71G01-Gal4&gt;UAS-CsChrimson</i> | mel female: pre-stimulation    | 1 | 20                              | Kruskal-Wallis test<br>P<0.0001 | 1v2                       | <0.0001          | ****    | 1 = A |
|        | sim     | <i>71G01-Gal4&gt;UAS-CsChrimson</i> | mel female: during stimulation | 2 | 20                              |                                 | 1v3                       | 0.0005           | ***     | 2 = B |
|        | sim     | <i>71G01-Gal4&gt;UAS-CsChrimson</i> | mel female: post-stimulation   | 3 | 20                              |                                 | 2v3                       | 0.0011           | **      | 3 = C |

#### Figures 4c

Analysis: Courtship Index = total time male courts a female / total time of the assay

Null hypothesis: The distribution of courtship indices towards a *D. simulans* (sim) female and *D. melanogaster* (mel) female will be identical

All are biological replicates assessed with a two-tailed test

| Figure | Species | Genotype                                | Light Stimulation | Target Female | Sample Size<br>(# males tested) | Statistical Test | P value |
|--------|---------|-----------------------------------------|-------------------|---------------|---------------------------------|------------------|---------|
| 4c     | sim     | <i>71G01-Gal4&gt;UAS-CsChrimson</i>     | Dim               | sim           | 11                              | Mann Whitney     | >0.9999 |
|        | sim     | <i>71G01-Gal4&gt;UAS-CsChrimson</i>     | Dim               | mel           | 11                              |                  |         |
|        | sim     | <i>71G01-Gal4&gt;UAS-CsChrimson</i>     | 0.75 uW/mm2       | sim           | 11                              | Mann Whitney     | 0.4854  |
|        | sim     | <i>71G01-Gal4&gt;UAS-CsChrimson</i>     | 0.75 uW/mm2       | mel           | 11                              |                  |         |
|        | sim     | <i>71G01-Gal4&gt;UAS-CsChrimson</i>     | 1 uW/mm2          | sim           | 11                              | Mann Whitney     | 0.0005  |
|        | sim     | <i>71G01-Gal4&gt;UAS-CsChrimson</i>     | 1 uW/mm2          | mel           | 11                              |                  |         |
|        | sim     | <i>71G01-Gal4&gt;UAS-CsChrimson</i>     | 1.25 uW/mm2       | sim           | 11                              | Mann Whitney     | <0.0001 |
|        | sim     | <i>71G01-Gal4&gt;UAS-CsChrimson</i>     | 1.25 uW/mm2       | mel           | 11                              |                  |         |
|        | sim     | <i>71G01-Gal4&gt;UAS-CsChrimson</i>     | 1.5 uW/mm2        | sim           | 11                              | Mann Whitney     | <0.0001 |
|        | sim     | <i>71G01-Gal4&gt;UAS-CsChrimson</i>     | 1.5 uW/mm2        | mel           | 11                              |                  |         |
|        | sim     | <i>sim 71G01-Gal4&gt;UAS-CsChrimson</i> | 2 uW/mm2          | sim           | 11                              | Mann Whitney     | <0.0001 |

|     |                               |          |     |    |                 |         |
|-----|-------------------------------|----------|-----|----|-----------------|---------|
| sim | sim 71G01-Gal4>UAS-CsChrimson | 2 uW/mm2 | mel | 11 |                 |         |
| sim | sim 71G01-Gal4>UAS-CsChrimson | Bright   | sim | 11 | Mann<br>Whitney | <0.0001 |
| sim | sim 71G01-Gal4>UAS-CsChrimson | Bright   | mel | 11 |                 |         |

### Figures 4g, h

Analysis: Peak  $\Delta F/F$  response to a *D. melanogaster* female stimulus per male per tap  
Sample size is 2-3 technical replicates per 6 biological replicates

| Figure | Species | Genotype                               | Stimulus    | Sample Size (# taps) | Statistical Test  | Slope $\pm$ SE          | 95% Confidence Intervals of Slope | Goodness of Fit |
|--------|---------|----------------------------------------|-------------|----------------------|-------------------|-------------------------|-----------------------------------|-----------------|
| 4g     | mel     | <i>fru<sup>Gal4</sup>&gt;UAS-GCaMP</i> | mel females | 17                   | Linear Regression | 0.4114 $\pm$ 0.1424     | 0.1079 to 0.7149                  | 0.3575          |
| 4f     | sim     | <i>fru<sup>Gal4</sup>&gt;UAS-GCaMP</i> | mel females | 21                   | Linear Regression | -0.002324 $\pm$ 0.06474 | -0.1374 to 0.1327                 | 0.0914          |

### Figures 5c, d

Analysis: Average peak  $\Delta F/F$  response to a female stimulus per male  
Null hypothesis: Responses to *D. simulans* (sim) female and *D. melanogaster* (mel) female are equal  
All are biological replicates assessed with a two-tailed test

| Figure | Species | Genotype                               | Stimulus            | Sample Size (# males imaged) | Statistical comparison | Statistical Test | P-value |
|--------|---------|----------------------------------------|---------------------|------------------------------|------------------------|------------------|---------|
| 5c     | mel     | <i>fru<sup>Gal4</sup>&gt;UAS-GCaMP</i> | mel and sim females | 7                            | mel v sim female       | Paired t-test    | 0.0031  |
|        | sim     | <i>fru<sup>Gal4</sup>&gt;UAS-GCaMP</i> | mel and sim females | 7                            | mel v sim female       | Paired t-test    | 0.0093  |
| 5d     | mel     | <i>25E04-Gal4&gt;UAS-GCaMP</i>         | mel and sim females | 6                            | mel v sim female       | Paired t-test    | 0.005   |
|        | sim     | <i>25E04-Gal4&gt;UAS-GCaMP</i>         | mel and sim females | 6                            | mel v sim female       | Paired t-test    | 0.0059  |

### Figures 5f

Analysis: Average peak  $\Delta F/F$  response to vAB3 stimulation per male  
Null hypothesis: Responses in P1 neurons are equal in *D. simulans* (sim) and *D. melanogaster* (mel) males  
All are biological replicates assessed with a two-tailed test

| Figure | Species | Genotype                               | Condition       | Sample Size (# of males imaged) | Statistical comparison    | Statistical Test                        | P-value |
|--------|---------|----------------------------------------|-----------------|---------------------------------|---------------------------|-----------------------------------------|---------|
| 5f     | mel     | <i>fru<sup>Gal4</sup>&gt;UAS-GCaMP</i> | mAL intact (+)  | 7                               | P1 mel male v P1 sim male | Unpaired t-test with Welch's correction | 0.0003  |
|        | sim     | <i>fru<sup>Gal4</sup>&gt;UAS-GCaMP</i> | mAL intact (+)  | 7                               | P1 sim male               |                                         |         |
| 5f     | mel     | <i>fru<sup>Gal4</sup>&gt;UAS-GCaMP</i> | mAL severed (-) | 8                               | P1 mel male v P1 sim male | Unpaired t-test with Welch's correction | 0.0318  |
|        | sim     | <i>fru<sup>Gal4</sup>&gt;UAS-GCaMP</i> | mAL severed (-) | 8                               | P1 sim male               |                                         |         |

### Extended Data Figure 1e

Analysis: Courtship Index = total time male courts a female / total time of the assay  
Null hypothesis: The courtship index is equivalent for all groups  
All are biological replicates assessed with a two-tailed test

Target females: *D. simulans* (sim), *D. sechellia* (sech), *D. melanogaster* (mel), *D. erecta* (erc) and *D. ananassae* (ana)  
 Different letters represent significant differences in courtship behavior

| Figure           | Genotype                        | Target female | # | Sample Size (# males tested) | Statistical Test                | Multiple comparisons test | Adjusted P-value | Summary | Group |
|------------------|---------------------------------|---------------|---|------------------------------|---------------------------------|---------------------------|------------------|---------|-------|
| Ex. Data Fig. 1e | sim wild type                   | sim           | 1 | 25                           | Kruskal-Wallis test<br>P=0.0515 | 1v2                       | >0.9999          | ns      | 1 = A |
|                  | sim <i>Gr32a</i> <sup>-/-</sup> | sim           | 2 | 24                           |                                 | 1v3                       | 0.4081           | ns      | 2 = A |
|                  | sim <i>ppk23</i> <sup>-/-</sup> | sim           | 3 | 24                           |                                 | 2v3                       | 0.0572           | ns      | 3 = A |
|                  | sim wild type                   | sech          | 1 | 10                           | Kruskal-Wallis test<br>P=0.0022 | 1v2                       | >0.9999          | ns      | 1 = A |
|                  | sim <i>Gr32a</i> <sup>-/-</sup> | sech          | 2 | 13                           |                                 | 1v3                       | 0.0438           | *       | 2 = A |
|                  | sim <i>ppk23</i> <sup>-/-</sup> | sech          | 3 | 13                           |                                 | 2v3                       | 0.0026           | **      | 3 = B |
|                  | sim wild type                   | mel           | 1 | 25                           | Kruskal-Wallis test<br>P<0.0001 | 1v2                       | >0.9999          | ns      | 1 = A |
|                  | sim <i>Gr32a</i> <sup>-/-</sup> | mel           | 2 | 24                           |                                 | 1v3                       | 0.0001           | ***     | 2 = A |
|                  | sim <i>ppk23</i> <sup>-/-</sup> | mel           | 3 | 24                           |                                 | 2v3                       | <0.0001          | ****    | 3 = B |
|                  | sim wild type                   | erc           | 1 | 25                           | Kruskal-Wallis test<br>P=0.0003 | 1v2                       | >0.9999          | ns      | 1 = A |
|                  | sim <i>Gr32a</i> <sup>-/-</sup> | erc           | 2 | 24                           |                                 | 1v3                       | 0.0037           | **      | 2 = A |
|                  | sim <i>ppk23</i> <sup>-/-</sup> | erc           | 3 | 24                           |                                 | 2v3                       | 0.0008           | ***     | 3 = B |
|                  | sim wild type                   | ana           | 1 | 17                           | Kruskal-Wallis test<br>P=0.0022 | 1v2                       | >0.9999          | ns      | 1 = A |
|                  | sim <i>Gr32a</i> <sup>-/-</sup> | ana           | 2 | 9                            |                                 | 1v3                       | 0.0033           | **      | 2 = A |
|                  | sim <i>ppk23</i> <sup>-/-</sup> | ana           | 3 | 16                           |                                 | 2v3                       | 0.034            | *       | 3 = B |

#### Extended Data Figure 2h

Analysis 2h: Chaining Index = fraction of time when more than three males were simultaneously courting  
 Null hypothesis unpaired t-test: The male spends equal time chaining  
 All are biological replicates assessed with a two-tailed test

| Figure          | Genotype                      | Target                            | Sample Size (# males tested) | Statistical Test                          | Comparison        | P-value |
|-----------------|-------------------------------|-----------------------------------|------------------------------|-------------------------------------------|-------------------|---------|
| Ex Data Fig. 2h | sim wild type                 | 8 wild type males                 | 8                            | Unpaired t-test with equal SD, two-tailed | WT v mutant males | 0.0004  |
|                 | sim <i>fru</i> <sup>-/-</sup> | 8 <i>fru</i> <sup>-/-</sup> males | 8                            |                                           |                   |         |

#### Extended Data Figure 3a

Analysis: counting number of *ppk23*+ soma are present in the distal three tarsal segments of the male's foreleg tarsi  
 Null hypothesis unpaired t-test: Males have equal number of soma  
 All are biological replicates assessed with a two-tailed test

| Figure          | Species | Genotype                       | Sample Size (# males examined) | Statistical Test                          | Comparison                               | P-value |
|-----------------|---------|--------------------------------|--------------------------------|-------------------------------------------|------------------------------------------|---------|
| Ex Data Fig. 3a | mel     | <i>ppk23-Gal4&gt;UAS-GFP</i>   | 6                              | Unpaired t-test with equal SD, two-tailed | # <i>ppk23</i> + soma in mel v sim males | 0.7014  |
|                 | sim     | <i>ppk23-Gal4&gt;UAS-GCaMP</i> | 6                              |                                           |                                          |         |

#### Extended Data Figure 3e

Analysis: peak  $\Delta F/F$  response to individual taps by a male  
 Null hypothesis: Responses are equivalent for all groups  
 2-3 technical replicates per several biological replicates assessed with a two-tailed test  
 Different letters represent significant differences in courtship behavior

| Figure         | Species | Genotype                                                    | Female Stimulus | # | Sample Size (# taps) | Statistical Test       | Multiple comparisons test | Adjusted P-value | Summary | Group |
|----------------|---------|-------------------------------------------------------------|-----------------|---|----------------------|------------------------|---------------------------|------------------|---------|-------|
| Ex Data Fig 3e | mel     | <i>WT fru<sup>Gal4</sup>&gt; UAS-GCaMP</i>                  | mel             | 1 | 19                   | One-way ANOVA P<0.0001 | 1v2                       | 0.0002           | ***     | 1 = A |
|                | mel     | <i>WT fru<sup>Gal4</sup>&gt; UAS-GCaMP</i>                  | sim             | 2 | 17                   |                        | 1v3                       | <0.0001          | ****    | 2 = B |
|                | mel     | <i>ppk23<sup>-/-</sup> fru<sup>Gal4</sup>&gt; UAS-GCaMP</i> | mel             | 3 | 17                   |                        | 1v4                       | <0.0001          | ****    | 3 = C |
|                | mel     | <i>ppk23<sup>-/-</sup> fru<sup>Gal4</sup>&gt; UAS-GCaMP</i> | sim             | 4 | 18                   |                        | 2v3                       | 0.0004           | ***     | 4 = C |
|                |         |                                                             |                 |   |                      |                        | 2v4                       | 0.0001           | ***     |       |
|                |         |                                                             |                 |   |                      |                        | 3v4                       | 0.9932           | ns      |       |
|                | sim     | <i>WT fru<sup>Gal4</sup>&gt; UAS-GCaMP</i>                  | mel             | 1 |                      | One-way ANOVA P<0.0001 | 1v2                       | <0.0001          | ****    | 1 = A |
|                | sim     | <i>WT fru<sup>Gal4</sup>&gt; UAS-GCaMP</i>                  | sim             | 2 |                      |                        | 1v3                       | <0.0001          | ****    | 2 = B |
|                | sim     | <i>ppk23<sup>-/-</sup> fru<sup>Gal4</sup>&gt; UAS-GCaMP</i> | mel             | 3 |                      |                        | 1v4                       | <0.0001          | ****    | 3 = C |
|                | sim     | <i>ppk23<sup>-/-</sup> fru<sup>Gal4</sup>&gt; UAS-GCaMP</i> | sim             | 4 |                      |                        | 2v3                       |                  | **      | 4 = C |
|                |         |                                                             |                 |   |                      |                        | 2v4                       | 0.00124          | **      |       |
|                |         |                                                             |                 |   |                      |                        | 3v4                       | 0.00232          | **      |       |
|                |         |                                                             |                 |   |                      |                        |                           | 0.997            | ns      |       |
|                | mel     | <i>ppk23-Gal4&gt; UAS-GCaMP</i>                             | mel             | 1 | 21                   | One-way ANOVA P<0.0001 | 1v2                       | 0.0001           | ***     | 1 = A |
|                | mel     | <i>ppk23-Gal4&gt; UAS-GCaMP</i>                             | sim             | 2 | 21                   |                        | 1v3                       | 0.2301           | ns      | 2 = B |
|                | sim     | <i>ppk23-Gal4&gt; UAS-GCaMP</i>                             | mel             | 3 | 18                   |                        | 1v4                       | 0.0247           | *       | 3 = A |
|                | sim     | <i>ppk23-Gal4&gt; UAS-GCaMP</i>                             | sim             | 4 | 17                   |                        | 2v3                       | <0.0001          | ****    | 4 = B |
|                |         |                                                             |                 |   |                      |                        | 2v4                       | 0.5184           | ns      |       |
|                |         |                                                             |                 |   |                      |                        | 3v4                       | <0.0001          | ****    |       |

### Extended Data Figure 3f

Analysis: Average peak  $\Delta F/F$  response to bristle stimulation per male

Null hypothesis: Responses are equivalent for all groups

All are biological replicates assessed with a two-tailed test

| Figure         | Species | Genotype                        | Chemical Stimulus | Sample Size (# males imaged) | Statistical comparison | Statistical Test | P-value |
|----------------|---------|---------------------------------|-------------------|------------------------------|------------------------|------------------|---------|
| Ex Data Fig 3f | mel     | <i>ppk23-Gal4&gt; UAS-GCaMP</i> | 7,11-HD           | 5                            | Soma A v B             | Paired t-test    | 0.0303  |
|                | mel     | <i>ppk23-Gal4&gt; UAS-GCaMP</i> | EtOH              | 5                            | Soma A v B             | Paired t-test    | 0.099   |
|                | sim     | <i>ppk23-Gal4&gt; UAS-GCaMP</i> | 7,11-HD           | 5                            | Soma A v B             | Paired t-test    | 0.0218  |
|                | sim     | <i>ppk23-Gal4&gt; UAS-GCaMP</i> | EtOH              | 5                            | Soma A v B             | Paired t-test    | 0.2075  |

|     |                                           |         |   |           |                 |        |
|-----|-------------------------------------------|---------|---|-----------|-----------------|--------|
| mel | <i>ppk23-Gal4&gt;</i><br><i>UAS-GCaMP</i> | 7,11-HD | 5 | mel v sim | Unpaired t-test | 0.2834 |
| sim | <i>ppk23-Gal4&gt;</i><br><i>UAS-GCaMP</i> | 7,11-HD | 5 |           |                 |        |

### Extended Data Figure 4b-f, 6f

Analysis: Courtship Index = total time male courts a female / total time of the assay

Null hypothesis: The courtship index is equivalent for all groups

All are biological replicates assessed with a two-tailed test

| Figure          | Species | Genotype                                       | Target female              | # | Sample Size (# males tested) | Statistical Test                | Multiple comparisons test | Adjusted P-value | Summary | Group |
|-----------------|---------|------------------------------------------------|----------------------------|---|------------------------------|---------------------------------|---------------------------|------------------|---------|-------|
| Ex Data Fig. 4b | mel     | <i>71G01-Gal4&gt;</i><br><i>UAS-CsChrimson</i> | magnet: pre-stimulation    | 1 | 6                            | Kruskal-Wallis test<br>P<0.0001 | 1v2                       | <0.0001          | ****    | 1 = A |
|                 | mel     | <i>71G01-Gal4&gt;</i><br><i>UAS-CsChrimson</i> | magnet: during stimulation | 2 | 6                            |                                 | 1v3                       | 0.0428           | *       | 2 = B |
|                 | mel     | <i>71G01-Gal4&gt;</i><br><i>UAS-CsChrimson</i> | magnet: post-stimulation   | 3 | 6                            |                                 | 2v3                       | 0.0428           | *       | 3 = C |
| Ex Data Fig. 4c | sim     | <i>71G01-Gal4&gt;</i><br><i>UAS-CsChrimson</i> | magnet: 0mm/s              | 1 | 11                           | One-way ANOVA<br>P<0.0001       | 1v2                       | 0.5369           | ns      | 1 = A |
|                 | sim     | <i>71G01-Gal4&gt;</i><br><i>UAS-CsChrimson</i> | magnet: 3 mm/s             | 2 | 7                            |                                 | 1v3                       | <0.0001          | ****    | 2 = A |
|                 | sim     | <i>71G01-Gal4&gt;</i><br><i>UAS-CsChrimson</i> | magnet: 6 mm/s             | 3 | 11                           |                                 | 1v4                       | <0.0001          | ****    | 3 = B |
|                 | sim     | <i>71G01-Gal4&gt;</i><br><i>UAS-CsChrimson</i> | magnet: 10 mm/s            | 4 | 11                           |                                 | 1v5                       | <0.0001          | ****    | 4 = B |
|                 | sim     | <i>71G01-Gal4&gt;</i><br><i>UAS-CsChrimson</i> | magnet: 20 mm/s            | 5 | 11                           |                                 | 2v3                       | 0.0003           | ***     | 5 = B |
|                 |         |                                                |                            |   |                              |                                 | 2v4                       | <0.0001          | ****    |       |
|                 |         |                                                |                            |   |                              |                                 | 2v5                       | <0.0001          | ****    |       |
|                 |         |                                                |                            |   | 3v4                          | 0.6909                          | ns                        |                  |         |       |
|                 |         |                                                |                            |   | 3v5                          | 0.2097                          | ns                        |                  |         |       |
|                 |         |                                                |                            |   | 4v5                          | 0.9076                          | ns                        |                  |         |       |
| Ex Data Fig. 4d | sim     | <i>71G01-Gal4</i>                              | magnet: during stimulation | 1 | 5                            | Kruskal-Wallis test<br>P<0.0001 | 1v2                       | >0.9999          | ns      | 1 = A |
|                 | sim     | <i>UAS-CsChrimson</i>                          | magnet: during stimulation | 2 | 5                            |                                 | 1v3                       | 0.0029           | **      | 2 = B |
|                 | sim     | <i>71G01-Gal4&gt;</i><br><i>UAS-CsChrimson</i> | magnet: during stimulation | 3 | 18                           |                                 | 2v3                       | 0.0017           | **      | 3 = C |
|                 | sim     | <i>71G01-Gal4</i>                              | magnet: post-stimulation   | 1 | 5                            | Kruskal-Wallis test<br>P=0.0002 | 1v2                       | >0.9999          | ns      | 1 = A |
|                 | sim     | <i>UAS-CsChrimson</i>                          | magnet: post-stimulation   | 2 | 5                            |                                 | 1v3                       | 0.0173           | *       | 2 = A |

|                 |                   |                                     |                                |    |     |                                 |         |         |         |       |
|-----------------|-------------------|-------------------------------------|--------------------------------|----|-----|---------------------------------|---------|---------|---------|-------|
|                 | sim               | <i>71G01-Gal4&gt;UAS-CsChrimson</i> | magnet: post-stimulation       | 3  | 18  |                                 | 2v3     | 0.0011  | **      | 3 = B |
| Ex Data Fig. 4e | sim               | <i>71G01-Gal4</i>                   | sim female: during stimulation | 1  | 12  |                                 | 1v2     | >0.9999 | ns      | 1 = A |
|                 | sim               | <i>UAS-CsChrimson</i>               | sim female: during stimulation | 2  | 12  | Kruskal-Wallis test<br>P<0.0001 | 1v3     | <0.0001 | ****    | 2 = A |
|                 | sim               | <i>71G01-Gal4&gt;UAS-CsChrimson</i> | sim female: during stimulation | 3  | 20  |                                 | 2v3     | <0.0001 | ****    | 3 = B |
| sim             | <i>71G01-Gal4</i> | sim female: post-stimulation        | 1                              | 12 | 1v2 |                                 | >0.9999 | ns      | 1 = A   |       |
|                 | sim               | <i>UAS-CsChrimson</i>               | sim female: post-stimulation   | 2  | 12  | Kruskal-Wallis test<br>P<0.0001 | 1v3     | <0.0001 | ****    | 2 = A |
|                 | sim               | <i>71G01-Gal4&gt;UAS-CsChrimson</i> | sim female: post-stimulation   | 3  | 20  |                                 | 2v3     | <0.0001 | ****    | 3 = B |
| Ex Data Fig. 4f | sim               | <i>71G01-Gal4</i>                   | mel female: during stimulation | 1  | 11  |                                 |         | 1v2     | >0.9999 | ns    |
|                 | sim               | <i>UAS-CsChrimson</i>               | mel female: during stimulation | 2  | 12  | Kruskal-Wallis test<br>P<0.0001 | 1v3     | <0.0001 | ****    | 2 = A |
|                 | sim               | <i>71G01-Gal4&gt;UAS-CsChrimson</i> | mel female: during stimulation | 3  | 18  |                                 | 2v3     | <0.0001 | ****    | 3 = B |
| sim             | <i>71G01-Gal4</i> | mel female: post-stimulation        | 1                              | 11 | 1v2 |                                 | >0.9999 | ns      | 1 = A   |       |
|                 | sim               | <i>UAS-CsChrimson</i>               | mel female: post-stimulation   | 2  | 12  | Kruskal-Wallis test<br>P<0.0001 | 1v3     | <0.0001 | ****    | 2 = A |
|                 | sim               | <i>71G01-Gal4&gt;UAS-CsChrimson</i> | mel female: post-stimulation   | 3  | 18  |                                 | 2v3     | <0.0001 | ****    | 3 = B |
| Ex Data Fig. 6f | sim               | <i>25E04-Gal4</i>                   | sim female                     | 1  | 19  |                                 |         | 1v2     | >0.9999 | ns    |
|                 | sim               | <i>UAS-CsChrimson</i>               | sim female                     | 2  | 17  | Kruskal-Wallis test<br>P<0.0001 | 1v3     | 0.0081  | **      | 2 = A |
|                 | sim               | <i>25E04-Gal4&gt;UAS-CsChrimson</i> | sim female                     | 3  | 19  |                                 | 2v3     | 0.0006  | ***     | 3 = B |

**Extended Data Figure 4h-j, 6b, 6d, 6g**

Analysis: peak  $\Delta F/F$  response to individual taps by a male

Null hypothesis: Responses are equivalent for all groups

2-3 technical replicates per biological replicate assessed with a two-tailed test

| Figure          | Species | Genotype                                            | Female Stimulus |   | Sample Size (# of taps) | Statistical Test                | Dunn's multiple comparisons test | Adjusted P-value              | Summary          | Group |
|-----------------|---------|-----------------------------------------------------|-----------------|---|-------------------------|---------------------------------|----------------------------------|-------------------------------|------------------|-------|
| Ex Data Fig. 4h | mel     | <i>WT 71G01-Gal4&gt; UAS-GCaMP</i>                  | mel             | 1 | 9                       | One-way ANOVA<br>P<0.0001       | 1v2                              | 0.0012                        | **               | 1 = A |
|                 | mel     | <i>WT 71G01-Gal4&gt; UAS-GCaMP</i>                  | sim             | 2 | 9                       |                                 | 1v3                              | 0.0003                        | ***              | 2 = B |
|                 | mel     | <i>ppk23<sup>+/+</sup> 71G01-Gal4&gt; UAS-GCaMP</i> | mel             | 3 | 9                       |                                 | 1v4                              | 0.0006                        | ***              | 3 = B |
|                 | mel     | <i>ppk23<sup>+/+</sup> 71G01-Gal4&gt; UAS-GCaMP</i> | sim             | 4 | 9                       |                                 | 2v3<br>2v4<br>3v4                | 0.9538<br>0.9937<br>0.9938    | ns<br>ns<br>ns   | 4 = B |
| Ex Data Fig. 4i | mel     | <i>WT fru-Gal4&gt; UAS-GCaMP</i>                    | mel             | 1 | 12                      | One-way ANOVA<br>P<0.0001       | 1v2                              | 0.0012                        | **               | 1 = A |
|                 | mel     | <i>WT fru-Gal4&gt; UAS-GCaMP</i>                    | sim             | 2 | 12                      |                                 | 1v3                              | <0.0001                       | ****             | 2 = B |
|                 | mel     | <i>ppk23<sup>+/+</sup> fru-Gal4&gt; UAS-GCaMP</i>   | mel             | 3 | 12                      |                                 | 1v4                              | 0.0003                        | ***              | 3 = B |
|                 | mel     | <i>ppk23<sup>+/+</sup> fru-Gal4&gt; UAS-GCaMP</i>   | sim             | 4 | 12                      |                                 | 2v3<br>2v4<br>3v4                | 0.8855<br>0.9907<br>0.9705    | ns<br>ns<br>ns   | 4 = B |
| Ex Data Fig. 4j | sim     | <i>WT fru-Gal4&gt; UAS-GCaMP</i>                    | mel             | 1 | 21                      | One-way ANOVA<br>P<0.0001       | 1v2                              | <0.0001                       | ****             | 1 = A |
|                 | sim     | <i>WT fru-Gal4&gt; UAS-GCaMP</i>                    | sim             | 2 | 21                      |                                 | 1v3                              | <0.0001                       | ****             | 2 = B |
|                 | sim     | <i>ppk23<sup>+/+</sup> fru-Gal4&gt; UAS-GCaMP</i>   | mel             | 3 | 24                      |                                 | 1v4                              | <0.0001                       | ****             | 3 = C |
|                 | sim     | <i>ppk23<sup>+/+</sup> fru-Gal4&gt; UAS-GCaMP</i>   | sim             | 4 | 24                      |                                 | 2v3<br>2v4<br>3v4                | 0.0002<br>0.0002<br>0.9271    | ***<br>***<br>ns | 4 = C |
| Ex Data Fig. 6b | mel     | <i>WT AbdB-Gal4&gt; UAS-GCaMP</i>                   | mel             | 1 | 9                       | Kruskal-Wallis Test<br>P=0.0002 | 1v2                              | 0.0041                        | **               | 1 = A |
|                 | mel     | <i>WT AbdB-Gal4&gt; UAS-GCaMP</i>                   | sim             | 2 | 9                       |                                 | 1v3                              | 0.0004                        | ***              | 2 = B |
|                 | mel     | <i>ppk23<sup>+/+</sup> AbdB-Gal4&gt; UAS-GCaMP</i>  | mel             | 3 | 9                       |                                 | 1v4                              | 0.0056                        | **               | 3 = B |
|                 | mel     | <i>ppk23<sup>+/+</sup> AbdB-Gal4&gt; UAS-GCaMP</i>  | sim             | 4 | 9                       |                                 | 2v3<br>2v4<br>3v4                | >0.9999<br>>0.9999<br>>0.9999 | ns<br>ns<br>ns   | 4 = B |
| Ex Data Fig. 6d | mel     | <i>WT fru-Gal4&gt; UAS-GCaMP</i>                    | mel             | 1 | 18                      | One-way ANOVA<br>P<0.0001       | 1v2                              | <0.0001                       | ****             | 1 = A |
|                 | mel     | <i>WT fru-Gal4&gt; UAS-GCaMP</i>                    | sim             | 2 | 16                      |                                 | 1v3                              | <0.0001                       | ****             | 2 = B |

|                    |     |                                                             |     |   |     |                           |        |         |      |       |
|--------------------|-----|-------------------------------------------------------------|-----|---|-----|---------------------------|--------|---------|------|-------|
|                    | mel | <i>ppk23<sup>-/-</sup> fru-Gal4&gt;</i><br><i>UAS-GCaMP</i> | mel | 3 | 18  |                           | 1v4    | <0.0001 | **** | 3 = B |
|                    | mel | <i>ppk23<sup>-/-</sup> fru-Gal4&gt;</i><br><i>UAS-GCaMP</i> | sim | 4 | 18  |                           | 2v3    | 0.4977  | ns   | 4 = B |
|                    |     |                                                             |     |   |     |                           | 2v4    | 0.3786  | ns   |       |
|                    |     |                                                             |     |   |     |                           | 3v4    | 0.9967  | ns   |       |
|                    | sim | <i>WT fru-Gal4&gt;</i><br><i>UAS-GCaMP</i>                  | mel | 1 | 22  |                           | 1v2    | <0.0001 | **** | 1 = A |
|                    | sim | <i>WT fru-Gal4&gt;</i><br><i>UAS-GCaMP</i>                  | sim | 2 | 21  | One-way ANOVA<br>P<0.0001 | 1v3    | <0.0001 | **** | 2 = B |
|                    | sim | <i>ppk23<sup>-/-</sup> fru-Gal4&gt;</i><br><i>UAS-GCaMP</i> | mel | 3 | 18  |                           | 1v4    | <0.0001 | **** | 3 = B |
|                    | sim | <i>ppk23<sup>-/-</sup> fru-Gal4&gt;</i><br><i>UAS-GCaMP</i> | sim | 4 | 18  |                           | 2v3    | 0.858   | ns   | 4 = B |
|                    |     |                                                             |     |   |     |                           | 2v4    | 0.8457  | ns   |       |
|                    |     |                                                             |     |   |     |                           | 3v4    | >0.9999 | ns   |       |
| Ex Data<br>Fig. 6g | mel | <i>25E04-Gal4&gt;</i><br><i>UAS-GCaMP</i>                   | mel | 1 | 19  |                           | 1v2    | 0.0001  | ***  | 1 = A |
|                    | mel | <i>25E04-Gal4&gt;</i><br><i>UAS-GCaMP</i>                   | sim | 2 | 15  | One-way ANOVA<br>P<0.0001 | 1v3    | 0.6114  | ns   | 2 = B |
|                    | sim | <i>25E04-Gal4&gt;</i><br><i>UAS-GCaMP</i>                   | mel | 3 | 15  |                           | 1v4    | <0.0001 | **** | 3 = A |
|                    | sim | <i>25E04-Gal4&gt;</i><br><i>UAS-GCaMP</i>                   | sim | 4 | 15  |                           | 2v3    | 0.0104  | *    | 4 = B |
|                    |     |                                                             |     |   | 2v4 |                           | 0.2239 | ns      |      |       |
|                    |     |                                                             |     |   |     |                           | 3v4    | <0.0001 | **** |       |

### Extended Data Figures 6c, h

Analysis: Average peak  $\Delta F/F$  response to a female stimulus per male

Null hypothesis: Responses to *D. simulans* (sim) female and *D. melanogaster* (mel) female are equal

All are biological replicates assessed with a two-tailed test

| Figure             | Species | Genotype                                                              | Female Stimulus | Sample Size (# of males imaged) | Statistical comparison          | Statistical Test | P-value |
|--------------------|---------|-----------------------------------------------------------------------|-----------------|---------------------------------|---------------------------------|------------------|---------|
| Ex Data<br>Fig. 6c | mel     | <i>ppk23<sup>-/-</sup> fru-Gal4&gt;</i><br><i>UAS-GCaMP</i>           | mel             | 6                               | mel female<br>v<br>sim female   | Paired t-test    | 0.7189  |
|                    | mel     | <i>ppk23<sup>-/-</sup> fru<sup>Gal4</sup>&gt;</i><br><i>UAS-GCaMP</i> | sim             | 6                               |                                 |                  |         |
|                    | sim     | <i>ppk23<sup>-/-</sup> fru<sup>Gal4</sup>&gt;</i><br><i>UAS-GCaMP</i> | mel             | 5                               | mel female<br>v<br>sim female   | Paired t-test    | 0.9361  |
|                    | sim     | <i>ppk23<sup>-/-</sup> fru<sup>Gal4</sup>&gt;</i><br><i>UAS-GCaMP</i> | sim             | 5                               |                                 |                  |         |
| Ex Data<br>Fig. 6h | mel     | <i>fru<sup>Gal4</sup>&gt;UAS-GCaMP</i><br><i>pre-PTX injection</i>    | mel             | 6                               | mel female<br>pre v<br>post PTX | Paired t-test    | 0.0089  |
|                    | mel     | <i>fru<sup>Gal4</sup>&gt;UAS-GCaMP</i><br><i>post-PTX injection</i>   | mel             | 6                               |                                 |                  |         |
|                    | mel     | <i>fru<sup>Gal4</sup>&gt;UAS-GCaMP</i><br><i>pre-PTX injection</i>    | sim             | 6                               | sim female<br>pre v<br>post PTX | Paired t-test    | 0.7516  |
|                    | mel     | <i>fru<sup>Gal4</sup>&gt;UAS-GCaMP</i><br><i>post-PTX injection</i>   | sim             | 6                               |                                 |                  |         |

|     |                                                                     |     |   |                                 |               |        |
|-----|---------------------------------------------------------------------|-----|---|---------------------------------|---------------|--------|
| sim | <i>fru<sup>Gal4</sup>&gt;UAS-GCaMP</i><br><i>pre-PTX injection</i>  | mel | 6 | mel female<br>pre v<br>post PTX | Paired t-test | 0.0001 |
| sim | <i>fru<sup>Gal4</sup>&gt;UAS-GCaMP</i><br><i>post-PTX injection</i> | mel | 6 |                                 |               |        |
| sim | <i>fru<sup>Gal4</sup>&gt;UAS-GCaMP</i><br><i>pre-PTX injection</i>  | sim | 6 | sim female<br>pre v<br>post PTX | Paired t-test | 0.3620 |
| sim | <i>fru<sup>Gal4</sup>&gt;UAS-GCaMP</i><br><i>post-PTX injection</i> | sim | 6 |                                 |               |        |

### Extended Data Figures 7c, e,

Analysis: Average peak  $\Delta F/F$  response to vAB3 stimulation in a given neural population per male

Null hypothesis: Responses across different conditions are equal

All are biological replicates assessed with a two-tailed test

| Figure          | Species | Genotype                                                       | Neural Population Imaged | #  | Sample Size (# males imaged) | Statistical Test                | Multiple comparisons test | Adjusted P-value | Summary | Group |
|-----------------|---------|----------------------------------------------------------------|--------------------------|----|------------------------------|---------------------------------|---------------------------|------------------|---------|-------|
| Ex Data Fig. 7c | mel     | <i>fru<sup>Gal4</sup>&gt;UAS-GCaMP</i><br><i>pre-severing</i>  | vAB3                     | 1  | 6                            | Kruskal-Wallis test<br>P=0.0004 | 1v2                       | >0.9999          | ns      | 1 = A |
|                 | mel     | <i>fru<sup>Gal4</sup>&gt;UAS-GCaMP</i><br><i>mock severing</i> | vAB3                     | 2  | 6                            |                                 | 1v3                       | 0.0043           | **      | 2 = A |
|                 | mel     | <i>fru<sup>Gal4</sup>&gt;UAS-GCaMP</i><br><i>vAB3 severing</i> | vAB3                     | 3  | 6                            |                                 | 2v3                       | 0.0242           | *       | 3 = B |
|                 | mel     | <i>fru<sup>Gal4</sup>&gt;UAS-GCaMP</i><br><i>pre-severing</i>  | mAL                      | 1  | 6                            | Kruskal-Wallis test<br>P=0.0003 | 1v2                       | >0.9999          | ns      | 1 = A |
|                 | mel     | <i>fru<sup>Gal4</sup>&gt;UAS-GCaMP</i><br><i>mock severing</i> | mAL                      | 2  | 6                            |                                 | 1v3                       | 0.0062           | **      | 2 = A |
|                 | mel     | <i>fru<sup>Gal4</sup>&gt;UAS-GCaMP</i><br><i>vAB3 severing</i> | mAL                      | 3  | 6                            |                                 | 2v3                       | 0.0175           | *       | 3 = B |
|                 | sim     | <i>fru<sup>Gal4</sup>&gt;UAS-GCaMP</i><br><i>pre-severing</i>  | vAB3                     | 1  | 7                            | Kruskal-Wallis test<br>P=0.0005 | >0.9999                   | >0.9999          | ns      | 1 = A |
|                 | sim     | <i>fru<sup>Gal4</sup>&gt;UAS-GCaMP</i><br><i>mock severing</i> | vAB3                     | 2  | 7                            |                                 | 0.0074                    | 0.0043           | **      | 2 = A |
|                 | sim     | <i>fru<sup>Gal4</sup>&gt;UAS-GCaMP</i><br><i>vAB3 severing</i> | vAB3                     | 3  | 7                            |                                 | 0.0148                    | 0.0242           | *       | 3 = B |
|                 | sim     | <i>fru<sup>Gal4</sup>&gt;UAS-GCaMP</i><br><i>pre-severing</i>  | mAL                      | 1  | 7                            | Kruskal-Wallis test<br>P=0.0005 | 1v2                       | >0.9999          | ns      | 1 = A |
|                 | sim     | <i>fru<sup>Gal4</sup>&gt;UAS-GCaMP</i><br><i>mock severing</i> | mAL                      | 2  | 7                            |                                 | 1v3                       | 0.0074           | **      | 2 = A |
|                 | sim     | <i>fru<sup>Gal4</sup>&gt;UAS-GCaMP</i><br><i>vAB3 severing</i> | mAL                      | 3  | 7                            |                                 | 2v3                       | 0.0148           | *       | 3 = B |
| Ex Data Fig. 7e | mel     | <i>fru<sup>Gal4</sup>&gt;UAS-GCaMP</i><br><i>pre-severing</i>  | vAB3                     | 8  | 8                            | mel vAB3<br>v<br>sim vAB3       | Unpaired t-test           | 0.4508           |         |       |
|                 | sim     | <i>fru<sup>Gal4</sup>&gt;UAS-GCaMP</i><br><i>pre-severing</i>  | vAB3                     | 8  |                              |                                 |                           |                  |         |       |
|                 | mel     | <i>fru<sup>Gal4</sup>&gt;UAS-GCaMP</i><br><i>pre-severing</i>  | mAL                      | 12 |                              | mel mAL<br>v<br>sim mAL         | Unpaired t-test           | 0.1636           |         |       |
|                 | sim     | <i>fru<sup>Gal4</sup>&gt;UAS-GCaMP</i><br><i>pre-severing</i>  | mAL                      | 8  |                              |                                 |                           |                  |         |       |

### Extended Data Figures 7f, g

Analysis: Peak  $\Delta F/F$  response to an individual stimulation of vAB3

Null hypothesis: Responses across conditions and species are equal



## Supplemental Table 2

### CRISPR and genotyping primers:

#### Extended Data Fig. 1d - Sim Gr32a CRISPR

*CrSim\_Gr32a-F*: gaaattaatacgcactactataGGCGAGATTCTTCGCGGATAgtttagagctagaaatagc

#### Extended Data Fig. 1d - Genotype sim Gr32a mutant

*SimSeq\_Gr32a-F*: CCCGAACACTTGGGTAATTG

*SimSeq\_Gr32a-R*: CGATCCACTGGTTCACATTG

#### Extended Data Fig. 1d - Sim ppk23 CRISPR

*CrSim\_ppk23-F*: gaaattaatacgcactactataGGTCTGGAATTCTCCCAGgtttagagctagaaatagc

#### Extended Data Fig. 1d - Genotype sim ppk23 mutant

*SimSeq\_ppk23-F*:

*SimSeq\_ppk23-R*: CCTGGGCCTCGTCGTAGTTA

#### Extended Data Fig. 2a - Fru Intron CRISPR

*CrSim\_FruIntron-F*: gaaattaatacgcactactataGGTCCGCGGAAAAGGGCGTAgtttagagctagaaatagc

#### Extended Data Fig. 2a - Fru Intron attP oligo

GCTTTGGGCGTTTGATTCTCGACGCTTAGCGCTCGGAATTCAGTGCTCAGTTCAGTAGGTGACACCATTGCGCTACG  
CCCCCAACTGAGAGAACTCAAAGTTACCCCAGTTGGGGCACTACGCGGCCGCGTAGGTGTTTTGGTCGGCCAC  
GACGTCTGGCCTATATTGCCACATATGGCAGTATATGCAACTCCTCCCG

#### Extended Data Fig. 2a - Genotype sim Fru-attP Intron

*Sim\_FruIntron-ExF*: GCTTTGGGCGTTTGATTCT

*Sim\_FruIntron-ExR*: GCACAACCCACATAAATCTCAA

#### Extended Data Fig. 2a - Genotype sim Fru-GFP

*Sim\_FruGFP-InR*: TTGGGACAACCTCCAGTGAAA

#### Extended Data Fig. 2a - Genotype Fru-GAL4

*Sim\_FruGAL4-InR*: TCGGTTTTTCTTTGGAGCAC

**Extended Data Fig. 2h** - Fru Exon CRISPR

*CrSim\_FruExon-F*: gaaattaatacgaactcactataGGTCCGCGGAAAAGGGCGTAgttttagagctagaaatagc

**Extended Data Fig. 2h** - Fru Exon attP oligo

GCTTTCAGCCAGAGCCAAATTGTTGGCGACGTACAGGATTATTTTGGCAATCCATACGCCCTTTTCCGCGGCTACG  
CCCCAACTGAGAGAACTCAAAGGTTACCCAGTTGGGGCACTACgaattcACCGCCCACAACACTGCGGCCACGCGA  
GTCGCCGCTGGGCGTGGGCCACCCTCACGGCCATGGGCACCTGCA

**Extended Data Fig. 2h** - Genotype sim Fru-attP Exon

*Sim\_FruExon-F*: GAGGCAATCGGTGGCTATAA

*Sim\_FruExon-R*: GGAGGCTTACCTAGGGGATG

attB-SAS-GFP Plasmid:

Forward primer for eGFP with SAS+Kozak sequences and reverse primer for eGFP with SV40 termination sequence

*SAS-Kozak-GFP-F*:

cggccgaggacatgcaCACCTGCgatcgtagtgccccaactgggtaaccttgaAAAAGCAGGCTTCAGTCGATCCAACATGGCGACTT  
GTCCCATCCCGGCATGTTTAAATATACTAATTATTCTTGAACATAATTTAATCAACCGATTATCTCTCTTCCGCGAGCA  
AAATGAGTAAAGGAGAAGAACCTTTTAC

*GFP-SV40-R*:

tacgcccccaacGGGGACCACTTTGTACAAGAAAGCTGGGTGATCCAGACATGATAAGATACATTGATGAGTTTGGACAAA  
CCACAAGTAAAGTGCAGTGAAAAAATGCTTTATTTGTGAAATTTGTGATGCTATTGCTTTATTTGTAACCATTATAAGC  
TGCAATAAACAAGTTCAGTTCCATAGGTTGGAATCTAAA

Nested PCR primers to add on gibson overhangs to GFP PCR product

*Gib-GFP-pHDattP-F*: acacctgcatcgtagtgccccaactgggtaaccttgaAAAAGCAGGCTTCAGTCGAT

*Gib-GFP-pHDattP-R*: tatagcattatatacgaagtatctacgcccccaacGGGGACCACTTTGTACAAGAAA

Linearize pHD-DsRed-attP plasmid

*Gib-Linear-pHDattP-F*: gttggggcgtagataacttc

*Gib-Linear-pHDattP-R*: tcaaaggtaccacagttgg

oligo for inserting attB

*EcoRI-attB*: AATTcGGAGTACGCGCCCGGGGAGCCCAAGGGCACGCCCTGGCACCCGCACCGCGGgc

*attB-NotI*:

ggccgcCCGCGGTGCGGGTGCCAGGGCGTGCCCTTGGGCTCCCCGGGCGCGTACTCCg

Sequencing primers for attB-SAS-GFP insertion

*DsRed-GFP-Seq-LeftF*: CATGCCGAACTCAGAAGTGA

*DsRed-GFP-Seq-LeftR*: TTGGGACAACCTCCAGTGAAA

*pHD-GFP-Seq-RightF*: TCCAACCTATGGAACTGAACTTG

*pHD-GFP-Seq-RightR*: CGACGTGTTCACTTTGCTTG

attB-SAS-Gal4 Plasmid:

Forward and reverse primer for Gal4 with Gibson assembly overhang

*Gibson-Gal4-F*

ATTTATCTCTCTCCGCAGCAAAGAAAGATGAAGCTACTGTCTTCTATCG

*Gibson-Gal4-R*

GATCCACTAGTTCTAGAGCGGCGCATAGGCCACTAGTtaaagatc

Forward primer for attB-SAS with Gibson assembly overhang

*Gibson-attBSAS-F*:

TGGGGTGTGCCCTTCGCTGAAGCAGGTGgAGCAGGTGgAATTcGGAGTA

*Gibson-attBSAS-R*:

GCATGCTTGTTTCGATAGAAGACAGTAGCTTCATCTTTCTTTGCTGCGGAAGAGAGAT
